# Supplementary material for: Ligand effects on NiII-catalysed alkane-hydroxylation with m-CPBA
Source: Royal Society of Chemistry journal article supplement (doi:10.1039/b615503k), 2007-01-01
Supplement: b615503k.pdf [file b615503k.pdf]

## **Supporting Information**

For

### **Ligand effects on Ni<sup>II</sup>-catalysed alkane-hydroxylation with *m*-CPBA**

**Takayuki Nagataki, Kenta Ishii, Yoshimitsu Tachi and Shinobu Itoh\***

*Department of Chemistry, Graduate School of Science, Osaka City University*

*3-3-138 Sugimoto, Sumiyoshi-ku, Osaka 558-8585, Japan*

*E-mail: shinobu@sci.osaka-cu.ac.jp*

**Table S1.** Summary of X-ray crystallographic data of the Ni<sup>II</sup>-complexes

| Compound                                       | <b>1b</b>                                                                                     | <b>2a</b>                                                         |
|------------------------------------------------|-----------------------------------------------------------------------------------------------|-------------------------------------------------------------------|
| empirical formula                              | C <sub>84</sub> H <sub>76</sub> N <sub>10</sub> O <sub>6</sub> Ni <sub>2</sub> B <sub>2</sub> | C <sub>47</sub> H <sub>47</sub> N <sub>4</sub> O <sub>2</sub> NiB |
| formula weight                                 | 1460.61                                                                                       | 769.42                                                            |
| crystal system                                 | monoclinic                                                                                    | triclinic                                                         |
| space group                                    | <i>C</i> 2/ <i>c</i> (#15)                                                                    | <i>P</i> -1 (#2)                                                  |
| <i>a</i> , Å                                   | 19.523(13)                                                                                    | 11.663(8)                                                         |
| <i>b</i> , Å                                   | 15.659(9)                                                                                     | 13.381(9)                                                         |
| <i>c</i> , Å                                   | 24.697(14)                                                                                    | 13.386(9)                                                         |
| $\alpha$ , deg                                 | 90                                                                                            | 96.83(2)                                                          |
| $\beta$ , deg                                  | 105.81(2)                                                                                     | 93.04(2)                                                          |
| $\gamma$ , deg                                 | 90                                                                                            | 107.82(3)                                                         |
| <i>V</i> , Å <sup>3</sup>                      | 7264.5(76)                                                                                    | 1965.9(22)                                                        |
| <i>Z</i>                                       | 4                                                                                             | 2                                                                 |
| <i>F</i> (000)                                 | 3056.00                                                                                       | 812.00                                                            |
| <i>D</i> <sub>calcd</sub> , g/cm <sup>3</sup>  | 1.335                                                                                         | 1.300                                                             |
| <i>T</i> , °C                                  | -100                                                                                          | -100                                                              |
| crystal size, mm                               | 0.48 x 0.27 x 0.27                                                                            | 0.55 x 0.45 x 0.35                                                |
| $\mu$ (MoK $\alpha$ ), cm <sup>-1</sup>        | 5.814                                                                                         | 5.382                                                             |
| 2 $\theta$ <sub>max</sub> , deg                | 54.9                                                                                          | 54.9                                                              |
| no. of reflns meads                            | 33599                                                                                         | 18122                                                             |
| no. of reflns obsd                             | 5840 [ <i>I</i> > 1.00 $\sigma$ ( <i>I</i> )]                                                 | 6839 [ <i>I</i> > 2.00 $\sigma$ ( <i>I</i> )]                     |
| no. of variables                               | 507                                                                                           | 543                                                               |
| <i>R</i> <sup>a</sup> ; <i>Rw</i> <sup>b</sup> | 0.028; 0.035                                                                                  | 0.051; 0.067                                                      |
| GOF                                            | 0.998                                                                                         | 1.001                                                             |

$${}^a R = \sum ||F_o| - |F_c|| / \sum |F_o| \quad {}^b R_w = [ \sum w (|F_o| - |F_c|)^2 / \sum w F_o^2 ]^{1/2}$$

**Table S1.** Summary of X-ray crystallographic data of the Ni<sup>II</sup>-complexes (continued)

| Compound                                               | <b>2b</b>                                                         | <b>3a•3MeOH</b>                                                   |
|--------------------------------------------------------|-------------------------------------------------------------------|-------------------------------------------------------------------|
| empirical formula                                      | C <sub>45</sub> H <sub>44</sub> N <sub>5</sub> O <sub>3</sub> NiB | C <sub>57</sub> H <sub>74</sub> N <sub>3</sub> O <sub>7</sub> NiB |
| formula weight                                         | 772.38                                                            | 982.74                                                            |
| crystal system                                         | orthorhombic                                                      | monoclinic                                                        |
| space group                                            | <i>P</i> 2 <sub>1</sub> 2 <sub>1</sub> 2 <sub>1</sub> (#19)       | <i>P</i> 2 <sub>1</sub> / <i>c</i> (#14)                          |
| <i>a</i> , Å                                           | 7.6143(17)                                                        | 12.679(6)                                                         |
| <i>b</i> , Å                                           | 15.539(5)                                                         | 21.180(14)                                                        |
| <i>c</i> , Å                                           | 31.036(10)                                                        | 20.233(12)                                                        |
| $\alpha$ , deg                                         | 90                                                                | 90                                                                |
| $\beta$ , deg                                          | 90                                                                | 97.10(3)                                                          |
| $\gamma$ , deg                                         | 90                                                                | 90                                                                |
| <i>V</i> , Å <sup>3</sup>                              | 3672.1(19)                                                        | 5391.5(56)                                                        |
| <i>Z</i>                                               | 4                                                                 | 4                                                                 |
| <i>F</i> (000)                                         | 1624.00                                                           | 2104.00                                                           |
| <i>D</i> <sub>calcd</sub> , g/cm <sup>3</sup>          | 1.397                                                             | 1.211                                                             |
| <i>T</i> , °C                                          | −102                                                              | −102                                                              |
| crystal size, mm                                       | 0.50 x 0.40 x 0.36                                                | 0.25 x 0.20 x 0.20                                                |
| $\mu$ (MoK $\alpha$ ), cm <sup>−1</sup>                | 5.793                                                             | 4.128                                                             |
| 2 $\theta$ <sub>max</sub> , deg                        | 55.0                                                              | 54.9                                                              |
| no. of reflns meads                                    | 34423                                                             | 49485                                                             |
| no. of reflns obsd                                     | 7620 [ <i>I</i> > 2.00 $\sigma$ ( <i>I</i> )]                     | 8067 [ <i>I</i> > 0.50 $\sigma$ ( <i>I</i> )]                     |
| no. of variables                                       | 541                                                               | 693                                                               |
| <i>R</i> <sup>a</sup> ; <i>R</i> <i>w</i> <sup>b</sup> | 0.026; 0.033                                                      | 0.038; 0.055                                                      |
| GOF                                                    | 0.997                                                             | 1.000                                                             |

$$^a R = \sum \|F_o\| - \|F_c\| / \sum \|F_o\| \quad ^b R_w = [ \sum w (|F_o| - |F_c|)^2 / \sum w F_o^2 ]^{1/2}$$

**Table S1.** Summary of X-ray crystallographic data of the Ni<sup>II</sup>-complexes (continued)

| Compound                                       | <b>3b</b>                                                        | <b>4a</b>                                                        |
|------------------------------------------------|------------------------------------------------------------------|------------------------------------------------------------------|
| empirical formula                              | C <sub>29</sub> H <sub>38</sub> N <sub>6</sub> O <sub>7</sub> Ni | C <sub>31</sub> H <sub>41</sub> N <sub>3</sub> O <sub>3</sub> Ni |
| formula weight                                 | 641.36                                                           | 562.38                                                           |
| crystal system                                 | triclinic                                                        | monoclinic                                                       |
| space group                                    | <i>P</i> -1 (#2)                                                 | <i>P</i> 2 <sub>1</sub> / <i>a</i> (#14)                         |
| <i>a</i> , Å                                   | 11.123(5)                                                        | 11.556(3)                                                        |
| <i>b</i> , Å                                   | 12.914(7)                                                        | 21.132(8)                                                        |
| <i>c</i> , Å                                   | 22.138(13)                                                       | 24.131(11)                                                       |
| $\alpha$ , deg                                 | 96.61(2)                                                         | 90                                                               |
| $\beta$ , deg                                  | 92.99(2)                                                         | 92.054(17)                                                       |
| $\gamma$ , deg                                 | 89.191(20)                                                       | 90                                                               |
| <i>V</i> , Å <sup>3</sup>                      | 3154.5(29)                                                       | 5888.9(37)                                                       |
| <i>Z</i>                                       | 4                                                                | 8                                                                |
| <i>F</i> (000)                                 | 1352.00                                                          | 2400.00                                                          |
| <i>D</i> <sub>calcd</sub> , g/cm <sup>3</sup>  | 1.350                                                            | 1.269                                                            |
| <i>T</i> , °C                                  | -102                                                             | -102                                                             |
| crystal size, mm                               | 0.23 x 0.22 x 0.15                                               | 0.60 x 0.36 x 0.18                                               |
| $\mu$ (MoK $\alpha$ ), cm <sup>-1</sup>        | 6.686                                                            | 6.941                                                            |
| 2 $\theta$ <sub>max</sub> , deg                | 55.0                                                             | 55.0                                                             |
| no. of reflns meads                            | 30130                                                            | 56961                                                            |
| no. of reflns obsd                             | 8700 [ <i>I</i> > 1.00 $\sigma$ ( <i>I</i> )]                    | 8218 [ <i>I</i> > 2.00 $\sigma$ ( <i>I</i> )]                    |
| no. of variables                               | 851                                                              | 767                                                              |
| <i>R</i> <sup>a</sup> ; <i>Rw</i> <sup>b</sup> | 0.040; 0.054                                                     | 0.032; 0.040                                                     |
| GOF                                            | 1.000                                                            | 1.000                                                            |

$$^a R = \sum ||F_o| - |F_c|| / \sum |F_o| \quad ^b R_w = [ \sum w (|F_o| - |F_c|)^2 / \sum w F_o^2 ]^{1/2}$$

**Table S1.** Summary of X-ray crystallographic data of the Ni<sup>II</sup>-complexes (continued)

| Compound                                                   | <b>4b</b>                                                        | <b>5a</b>                                                        |
|------------------------------------------------------------|------------------------------------------------------------------|------------------------------------------------------------------|
| empirical formula                                          | C <sub>29</sub> H <sub>38</sub> N <sub>4</sub> O <sub>4</sub> Ni | C <sub>23</sub> H <sub>27</sub> N <sub>3</sub> O <sub>5</sub> Ni |
| formula weight                                             | 565.34                                                           | 484.18                                                           |
| crystal system                                             | monoclinic                                                       | monoclinic                                                       |
| space group                                                | <i>P</i> 2 <sub>1</sub> / <i>c</i> (#14)                         | <i>P</i> 2 <sub>1</sub> / <i>n</i> (#14)                         |
| <i>a</i> , Å                                               | 11.887(6)                                                        | 12.217(7)                                                        |
| <i>b</i> , Å                                               | 20.791(10)                                                       | 12.711(6)                                                        |
| <i>c</i> , Å                                               | 11.743(5)                                                        | 14.359(9)                                                        |
| $\alpha$ , deg                                             | 90                                                               | 90                                                               |
| $\beta$ , deg                                              | 93.758(18)                                                       | 92.65(2)                                                         |
| $\gamma$ , deg                                             | 90                                                               | 90                                                               |
| <i>V</i> , Å <sup>3</sup>                                  | 2896.0(24)                                                       | 2227.5(21)                                                       |
| <i>Z</i>                                                   | 4                                                                | 4                                                                |
| <i>F</i> (000)                                             | 1200.00                                                          | 1016.00                                                          |
| <i>D</i> <sub>calcd</sub> , g/cm <sup>3</sup>              | 1.297                                                            | 1.444                                                            |
| <i>T</i> , °C                                              | −102                                                             | −102                                                             |
| crystal size, mm                                           | 0.60 x 0.35 x 0.10                                               | 0.60 x 0.35 x 0.30                                               |
| $\mu$ (MoK $\alpha$ ), cm <sup>−1</sup>                    | 7.094                                                            | 9.110                                                            |
| 2 $\theta$ <sub>max</sub> , deg                            | 54.9                                                             | 54.8                                                             |
| no. of reflns meads                                        | 27773                                                            | 20740                                                            |
| no. of reflns obsd                                         | 4552 [ <i>I</i> > 1.00 $\sigma$ ( <i>I</i> )]                    | 3644 [ <i>I</i> > 2.00 $\sigma$ ( <i>I</i> )]                    |
| no. of variables                                           | 381                                                              | 316                                                              |
| <i>R</i> <sup>a</sup> ; <i>R</i> <sub>w</sub> <sup>b</sup> | 0.023; 0.033                                                     | 0.029; 0.036                                                     |
| GOF                                                        | 0.996                                                            | 1.008                                                            |

$$^a R = \sum ||F_o| - |F_c|| / \sum |F_o| \quad ^b R_w = [ \sum w (|F_o| - |F_c|)^2 / \sum w F_o^2 ]^{1/2}$$

**Table S1.** Summary of X-ray crystallographic data of the Ni<sup>II</sup>-complexes (continued)

| Compound                                                   | <b>6a•C<sub>3</sub>H<sub>6</sub>O</b>                             |
|------------------------------------------------------------|-------------------------------------------------------------------|
| empirical formula                                          | C <sub>50</sub> H <sub>54</sub> N <sub>3</sub> O <sub>4</sub> NiB |
| formula weight                                             | 830.50                                                            |
| crystal system                                             | triclinic                                                         |
| space group                                                | <i>P</i> -1 (#2)                                                  |
| <i>a</i> , Å                                               | 12.478(8)                                                         |
| <i>b</i> , Å                                               | 14.135(8)                                                         |
| <i>c</i> , Å                                               | 14.821(8)                                                         |
| $\alpha$ , deg                                             | 62.383(15)                                                        |
| $\beta$ , deg                                              | 82.53(2)                                                          |
| $\gamma$ , deg                                             | 70.83(2)                                                          |
| <i>V</i> , Å <sup>3</sup>                                  | 2187.1(22)                                                        |
| <i>Z</i>                                                   | 2                                                                 |
| <i>F</i> (000)                                             | 880.00                                                            |
| <i>D</i> <sub>calcd</sub> , g/cm <sup>3</sup>              | 1.261                                                             |
| <i>T</i> , °C                                              | -102                                                              |
| crystal size, mm                                           | 0.55 x 0.35 x 0.30                                                |
| $\mu$ (MoK $\alpha$ ), cm <sup>-1</sup>                    | 4.915                                                             |
| 2 $\theta$ <sub>max</sub> , deg                            | 54.9                                                              |
| no. of reflns meads                                        | 21606                                                             |
| no. of reflns obsd                                         | 6266 [ <i>I</i> > 2.00 $\sigma$ ( <i>I</i> )]                     |
| no. of variables                                           | 586                                                               |
| <i>R</i> <sup>a</sup> ; <i>R</i> <sub>w</sub> <sup>b</sup> | 0.032; 0.039                                                      |
| GOF                                                        | 1.028                                                             |

$${}^a R = \sum \|F_o\| - \|F_c\| / \sum \|F_o\| \quad {}^b R_w = [ \sum w (|F_o| - |F_c|)^2 / \sum w F_o^2 ]^{1/2}$$

**Table S2.** Selected bond lengths (Å) and angles (deg) of the Ni<sup>II</sup>-complexes

---

| <b>1b</b>        |            |                  |            |
|------------------|------------|------------------|------------|
| Ni(1)–O(1)       | 2.0711(12) | Ni(1)–O(2)*      | 2.1233(15) |
| Ni(1)–N(1)       | 2.0851(14) | Ni(1)–N(2)       | 2.0469(14) |
| Ni(1)–N(3)       | 2.0408(16) | Ni(1)–N(4)       | 2.0547(13) |
| Ni(1)–Ni(1)*     | 4.8370(2)  |                  |            |
|                  |            |                  |            |
| O(1)–Ni(1)–O(2)* | 89.15(5)   | O(1)–Ni(1)–N(1)  | 169.62(5)  |
| O(1)–Ni(1)–N(2)  | 102.65(6)  | O(1)–Ni(1)–N(3)  | 87.22(5)   |
| O(1)–Ni(1)–N(4)  | 95.01(5)   | O(2)*–Ni(1)–N(1) | 99.29(6)   |
| O(2)*–Ni(1)–N(2) | 96.49(5)   | O(2)*–Ni(1)–N(3) | 173.82(5)  |
| O(2)*–Ni(1)–N(4) | 83.07(5)   | N(1)–Ni(1)–N(2)  | 82.50(5)   |
| N(1)–Ni(1)–N(3)  | 83.83(6)   | N(1)–Ni(1)–N(4)  | 80.14(5)   |
| N(2)–Ni(1)–N(3)  | 89.19(6)   | N(2)–Ni(1)–N(4)  | 162.32(6)  |
| N(3)–Ni(1)–N(4)  | 92.26(6)   |                  |            |
|                  |            |                  |            |
| <b>2a</b>        |            |                  |            |
| Ni(1)–O(1)       | 2.0971(17) | Ni(1)–O(2)       | 2.1653(17) |
| Ni(1)–N(1)       | 2.094(2)   | Ni(1)–N(2)       | 2.145(2)   |
| Ni(1)–N(3)       | 2.081(2)   | Ni(1)–N(4)       | 2.126(2)   |
|                  |            |                  |            |
| O(1)–Ni(1)–O(2)  | 62.02(7)   | O(1)–Ni(1)–N(1)  | 166.87(8)  |
| O(1)–Ni(1)–N(2)  | 88.26(8)   | O(1)–Ni(1)–N(3)  | 96.00(7)   |
| O(1)–Ni(1)–N(4)  | 87.49(8)   | O(2)–Ni(1)–N(1)  | 104.85(7)  |
| O(2)–Ni(1)–N(2)  | 82.87(7)   | O(2)–Ni(1)–N(3)  | 157.78(8)  |
| O(2)–Ni(1)–N(4)  | 88.01(8)   | N(1)–Ni(1)–N(2)  | 89.88(9)   |
| N(1)–Ni(1)–N(3)  | 97.10(8)   | N(1)–Ni(1)–N(4)  | 92.43(9)   |
| N(2)–Ni(1)–N(3)  | 93.86(9)   | N(2)–Ni(1)–N(4)  | 170.88(8)  |
| N(3)–Ni(1)–N(4)  | 94.61(9)   |                  |            |

---

<sup>a</sup>Estimated standard deviations are given in parentheses.

**Table S2.** Selected bond lengths (Å) and angles (deg) of the Ni<sup>II</sup>-complexes (continued)

---

| <b>2b</b>       |            |                 |            |
|-----------------|------------|-----------------|------------|
| Ni(1)–O(1)      | 2.1576(12) | Ni(1)–O(2)      | 2.1676(12) |
| Ni(1)–N(1)      | 2.1044(13) | Ni(1)–N(2)      | 2.0988(15) |
| Ni(1)–N(3)      | 2.0451(14) | Ni(1)–N(4)      | 2.1692(15) |
|                 |            |                 |            |
| O(1)–Ni(1)–O(2) | 59.85(4)   | O(1)–Ni(1)–N(1) | 165.79(4)  |
| O(1)–Ni(1)–N(2) | 84.14(5)   | O(1)–Ni(1)–N(3) | 96.20(5)   |
| O(1)–Ni(1)–N(4) | 88.03(5)   | O(2)–Ni(1)–N(1) | 106.90(4)  |
| O(2)–Ni(1)–N(2) | 85.93(5)   | O(2)–Ni(1)–N(3) | 156.04(5)  |
| O(2)–Ni(1)–N(4) | 84.90(5)   | N(1)–Ni(1)–N(2) | 90.03(5)   |
| N(1)–Ni(1)–N(3) | 96.88(5)   | N(1)–Ni(1)–N(4) | 96.21(5)   |
| N(2)–Ni(1)–N(3) | 91.25(5)   | N(2)–Ni(1)–N(4) | 170.10(5)  |
| N(3)–Ni(1)–N(4) | 95.61(5)   |                 |            |
|                 |            |                 |            |
| <b>3a</b>       |            |                 |            |
| Ni(1)–O(1)      | 2.0803(19) | Ni(1)–O(2)      | 2.0986(18) |
| Ni(1)–O(4)      | 2.054(2)   | Ni(1)–N(1)      | 2.079(2)   |
| Ni(1)–N(2)      | 2.063(2)   | Ni(1)–N(3)      | 2.064(2)   |
|                 |            |                 |            |
| O(1)–Ni(1)–O(2) | 87.08(7)   | O(1)–Ni(1)–O(4) | 90.83(8)   |
| O(1)–Ni(1)–N(1) | 92.67(8)   | O(1)–Ni(1)–N(2) | 92.38(8)   |
| O(1)–Ni(1)–N(3) | 168.90(8)  | O(2)–Ni(1)–O(4) | 92.30(8)   |
| O(2)–Ni(1)–N(1) | 91.89(8)   | O(2)–Ni(1)–N(2) | 174.57(9)  |
| O(2)–Ni(1)–N(3) | 83.59(8)   | O(4)–Ni(1)–N(1) | 174.67(8)  |
| O(4)–Ni(1)–N(2) | 93.11(8)   | O(4)–Ni(1)–N(3) | 95.51(9)   |
| N(1)–Ni(1)–N(2) | 82.73(9)   | N(1)–Ni(1)–N(3) | 81.68(9)   |
| N(2)–Ni(1)–N(3) | 96.35(8)   |                 |            |

---

<sup>a</sup>Estimated standard deviations are given in parentheses.



**Table S2.** Selected bond lengths (Å) and angles (deg) of the Ni<sup>II</sup>-complexes (continued)

---

| <b>3b (Molecule 1)</b> |            |                  |            |
|------------------------|------------|------------------|------------|
| Ni(1)–O(1)             | 2.148(2)   | Ni(1)–O(2)       | 2.089(2)   |
| Ni(1)–N(1)             | 2.075(2)   | Ni(1)–N(2)       | 2.057(3)   |
| Ni(1)–N(3)             | 2.081(3)   | Ni(1)–N(5)       | 2.025(3)   |
|                        |            |                  |            |
| O(1)–Ni(1)–O(2)        | 177.16(9)  | O(1)–Ni(1)–N(1)  | 90.14(9)   |
| O(1)–Ni(1)–N(2)        | 87.11(10)  | O(1)–Ni(1)–N(3)  | 96.24(10)  |
| O(1)–Ni(1)–N(5)        | 87.65(10)  | O(2)–Ni(1)–N(1)  | 88.05(10)  |
| O(2)–Ni(1)–N(2)        | 90.49(11)  | O(2)–Ni(1)–N(3)  | 85.58(11)  |
| O(2)–Ni(1)–N(5)        | 94.37(10)  | N(1)–Ni(1)–N(2)  | 82.66(11)  |
| N(1)–Ni(1)–N(3)        | 79.38(11)  | N(1)–Ni(1)–N(5)  | 173.92(12) |
| N(2)–Ni(1)–N(3)        | 161.73(11) | N(2)–Ni(1)–N(5)  | 102.87(12) |
| N(3)–Ni(1)–N(5)        | 95.23(12)  |                  |            |
|                        |            |                  |            |
| <b>3b (Molecule 2)</b> |            |                  |            |
| Ni(2)–O(5)             | 2.151(2)   | Ni(2)–O(6)       | 2.091(2)   |
| Ni(2)–N(6)             | 2.079(2)   | Ni(2)–N(7)       | 2.046(3)   |
| Ni(2)–N(8)             | 2.075(3)   | Ni(2)–N(10)      | 2.027(3)   |
|                        |            |                  |            |
| O(5)–Ni(2)–O(6)        | 176.42(10) | O(5)–Ni(2)–N(6)  | 89.79(9)   |
| O(5)–Ni(2)–N(7)        | 87.77(10)  | O(5)–Ni(2)–N(8)  | 95.67(10)  |
| O(5)–Ni(2)–N(10)       | 88.16(10)  | O(6)–Ni(2)–N(6)  | 87.78(10)  |
| O(6)–Ni(2)–N(7)        | 89.32(11)  | O(6)–Ni(2)–N(8)  | 86.47(10)  |
| O(6)–Ni(2)–N(10)       | 94.50(10)  | N(6)–Ni(2)–N(7)  | 82.63(11)  |
| N(6)–Ni(2)–N(8)        | 79.67(11)  | N(6)–Ni(2)–N(10) | 174.49(12) |
| N(7)–Ni(2)–N(8)        | 161.94(11) | N(7)–Ni(2)–N(10) | 102.39(12) |
| N(8)–Ni(2)–N(10)       | 95.45(12)  |                  |            |

---

<sup>a</sup>Estimated standard deviations are given in parentheses.

**Table S2.** Selected bond lengths (Å) and angles (deg) of the Ni<sup>II</sup>-complexes (continued)

---

| <b>4a (Molecule 1)</b> |            |                 |            |
|------------------------|------------|-----------------|------------|
| Ni(1)–O(1)             | 1.9874(16) | Ni(1)–O(2)      | 2.1086(18) |
| Ni(1)–O(3)             | 2.1829(18) | Ni(1)–N(1)      | 2.134(2)   |
| Ni(1)–N(2)             | 2.069(2)   | Ni(1)–N(3)      | 2.0749(19) |
|                        |            |                 |            |
| O(1)–Ni(1)–O(2)        | 84.63(7)   | O(1)–Ni(1)–O(3) | 83.56(6)   |
| O(1)–Ni(1)–N(1)        | 93.73(7)   | O(1)–Ni(1)–N(2) | 93.20(7)   |
| O(1)–Ni(1)–N(3)        | 172.23(7)  | O(2)–Ni(1)–O(3) | 61.39(6)   |
| O(2)–Ni(1)–N(1)        | 169.70(7)  | O(2)–Ni(1)–N(2) | 96.30(7)   |
| O(2)–Ni(1)–N(3)        | 89.50(7)   | O(3)–Ni(1)–N(1) | 108.34(7)  |
| O(3)–Ni(1)–N(2)        | 157.63(7)  | O(3)–Ni(1)–N(3) | 89.17(7)   |
| N(1)–Ni(1)–N(2)        | 93.93(7)   | N(1)–Ni(1)–N(3) | 91.14(7)   |
| N(2)–Ni(1)–N(3)        | 92.50(7)   |                 |            |
|                        |            |                 |            |
| <b>4a (Molecule 2)</b> |            |                 |            |
| Ni(2)–O(4)             | 1.9956(15) | Ni(2)–O(5)      | 2.1202(18) |
| Ni(2)–O(6)             | 2.1619(17) | Ni(2)–N(4)      | 2.087(2)   |
| Ni(2)–N(5)             | 2.0747(19) | Ni(2)–N(6)      | 2.087(2)   |
|                        |            |                 |            |
| O(4)–Ni(2)–O(5)        | 85.10(6)   | O(4)–Ni(2)–O(6) | 87.68(6)   |
| O(4)–Ni(2)–N(4)        | 93.70(7)   | O(4)–Ni(2)–N(5) | 87.79(7)   |
| O(4)–Ni(2)–N(6)        | 174.82(7)  | O(5)–Ni(2)–O(6) | 61.76(6)   |
| O(5)–Ni(2)–N(4)        | 164.41(7)  | O(5)–Ni(2)–N(5) | 99.66(7)   |
| O(5)–Ni(2)–N(6)        | 89.74(7)   | O(6)–Ni(2)–N(4) | 102.69(7)  |
| O(6)–Ni(2)–N(5)        | 161.19(7)  | O(6)–Ni(2)–N(6) | 90.25(7)   |
| N(4)–Ni(2)–N(5)        | 95.81(8)   | N(4)–Ni(2)–N(6) | 91.39(7)   |
| N(5)–Ni(2)–N(6)        | 92.68(8)   |                 |            |

---

<sup>a</sup>Estimated standard deviations are given in parentheses.

**Table S2.** Selected bond lengths (Å) and angles (deg) of the Ni<sup>II</sup>-complexes (continued)

---

| <b>4b</b>       |            |                 |            |
|-----------------|------------|-----------------|------------|
| Ni(1)–O(1)      | 1.9742(10) | Ni(1)–O(2)      | 2.1624(13) |
| Ni(1)–O(3)      | 2.1639(13) | Ni(1)–N(1)      | 2.0805(14) |
| Ni(1)–N(2)      | 2.0516(14) | Ni(1)–N(3)      | 2.0764(13) |
|                 |            |                 |            |
| O(1)–Ni(1)–O(2) | 82.94(4)   | O(1)–Ni(1)–O(3) | 85.12(4)   |
| O(1)–Ni(1)–N(1) | 95.69(5)   | O(1)–Ni(1)–N(2) | 93.17(5)   |
| O(1)–Ni(1)–N(3) | 170.68(5)  | O(2)–Ni(1)–O(3) | 59.96(4)   |
| O(2)–Ni(1)–N(1) | 164.51(5)  | O(2)–Ni(1)–N(2) | 99.08(5)   |
| O(2)–Ni(1)–N(3) | 88.35(5)   | O(3)–Ni(1)–N(1) | 104.56(5)  |
| O(3)–Ni(1)–N(2) | 159.04(5)  | O(3)–Ni(1)–N(3) | 87.67(5)   |
| N(1)–Ni(1)–N(2) | 96.40(5)   | N(1)–Ni(1)–N(3) | 91.82(5)   |
| N(2)–Ni(1)–N(3) | 91.46(5)   |                 |            |
|                 |            |                 |            |
| <b>5a</b>       |            |                 |            |
| Ni(1)–O(1)      | 2.0380(15) | Ni(1)–O(3)      | 2.0784(15) |
| Ni(1)–O(5)      | 2.0890(14) | Ni(1)–N(1)      | 2.1636(17) |
| Ni(1)–N(2)      | 2.0775(18) | Ni(1)–N(3)      | 2.1020(17) |
|                 |            |                 |            |
| O(1)–Ni(1)–O(3) | 95.45(5)   | O(1)–Ni(1)–O(5) | 93.75(6)   |
| O(1)–Ni(1)–N(1) | 166.53(6)  | O(1)–Ni(1)–N(2) | 90.01(6)   |
| O(1)–Ni(1)–N(3) | 94.39(6)   | O(3)–Ni(1)–O(5) | 89.58(5)   |
| O(3)–Ni(1)–N(1) | 90.54(6)   | O(3)–Ni(1)–N(2) | 83.65(6)   |
| O(3)–Ni(1)–N(3) | 169.81(6)  | O(5)–Ni(1)–N(1) | 98.36(6)   |
| O(5)–Ni(1)–N(2) | 172.55(6)  | O(5)–Ni(1)–N(3) | 87.16(6)   |
| N(1)–Ni(1)–N(2) | 78.65(6)   | N(1)–Ni(1)–N(3) | 80.40(6)   |
| N(2)–Ni(1)–N(3) | 98.98(6)   |                 |            |

---

<sup>a</sup>Estimated standard deviations are given in parentheses.

**Table S2.** Selected bond lengths (Å) and angles (deg) of the Ni<sup>II</sup>-complexes (continued)

---

| <b>6a</b>       |            |                 |            |
|-----------------|------------|-----------------|------------|
| Ni(1)–O(1)      | 2.1779(15) | Ni(1)–O(2)      | 2.1077(12) |
| Ni(1)–O(3)      | 2.1146(14) | Ni(1)–N(1)      | 2.097(2)   |
| Ni(1)–N(2)      | 2.0641(17) | Ni(1)–N(3)      | 2.0891(18) |
|                 |            |                 |            |
| O(1)–Ni(1)–O(2) | 61.62(6)   | O(1)–Ni(1)–O(3) | 80.71(5)   |
| O(1)–Ni(1)–N(1) | 159.74(6)  | O(1)–Ni(1)–N(2) | 102.96(6)  |
| O(1)–Ni(1)–N(3) | 89.53(6)   | O(2)–Ni(1)–O(3) | 88.00(5)   |
| O(2)–Ni(1)–N(1) | 98.98(6)   | O(2)–Ni(1)–N(2) | 164.44(7)  |
| O(2)–Ni(1)–N(3) | 85.81(5)   | O(3)–Ni(1)–N(1) | 93.54(6)   |
| O(3)–Ni(1)–N(2) | 91.61(6)   | O(3)–Ni(1)–N(3) | 170.09(6)  |
| N(1)–Ni(1)–N(2) | 96.57(7)   | N(1)–Ni(1)–N(3) | 95.06(7)   |
| N(2)–Ni(1)–N(3) | 92.28(7)   |                 |            |

---

<sup>a</sup>Estimated standard deviations are given in parentheses.

Fig. S1

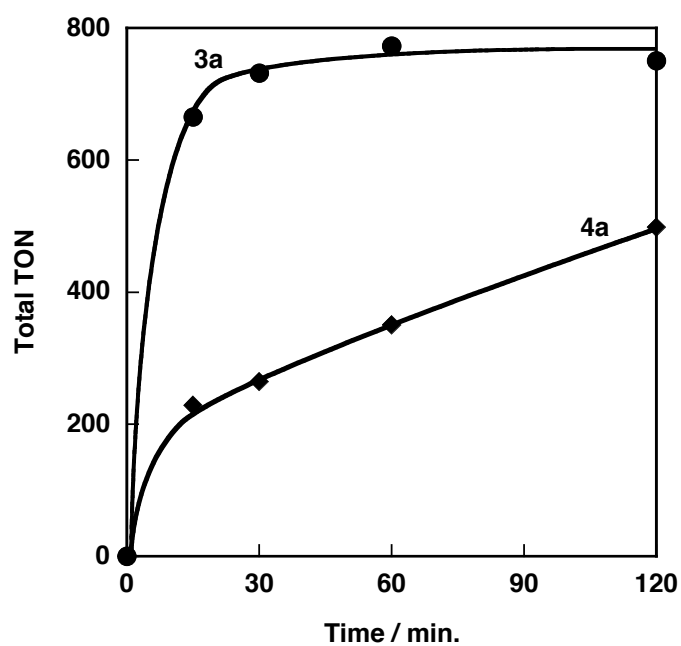

**Fig. S1** Time courses for the oxidation of cyclohexane (2.5 M) with *m*-CPBA (0.33 M) catalyzed by (●)  $[\text{Ni}^{\text{II}}(\text{D}^{\text{tbp}}\text{Pym2H})(\text{OAc})(\text{MeOH})]\text{BPh}_4$  (**3a**) (0.33 mM) and by (◆)  $[\text{Ni}^{\text{II}}(\text{D}^{\text{tbp}}\text{Pye2})(\text{OAc})]$  (**4a**) (0.33 mM) in  $\text{CH}_2\text{Cl}_2/\text{CH}_3\text{CN}$  (v/v = 3/1, totally 6 ml) at room temperature.

Fig. S2

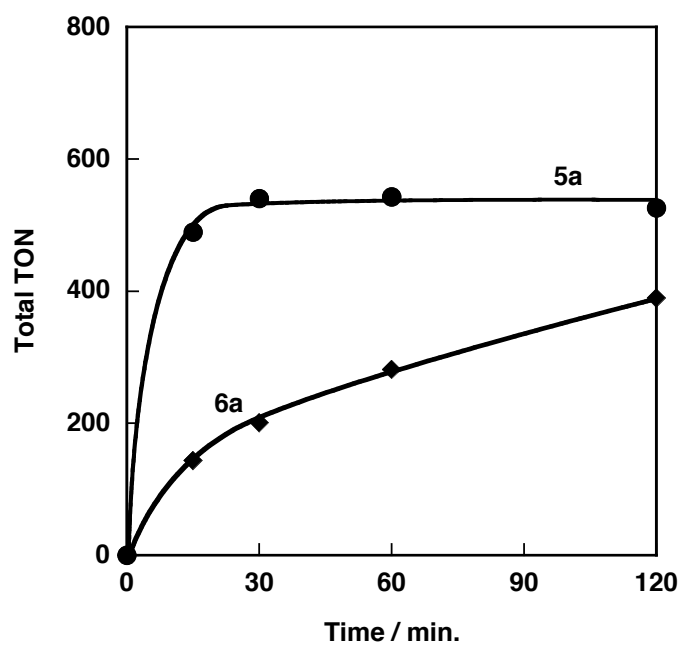

**Fig. S2** Time courses for the oxidation of cyclohexane (2.5 M) with *m*-CPBA (0.33 M) catalyzed by (●)  $[\text{Ni}^{\text{II}}(\text{BzPym2})(\text{OAc})_2(\text{H}_2\text{O})]$  (**5a**) (0.33 mM) and by (◆)  $[\text{Ni}^{\text{II}}(\text{BzPye2})(\text{OAc})(\text{H}_2\text{O})]\text{BPh}_4$  (**6a**) (0.33 mM) in  $\text{CH}_2\text{Cl}_2/\text{CH}_3\text{CN}$  (v/v = 3/1, totally 6 ml) at room temperature.

Fig. S3

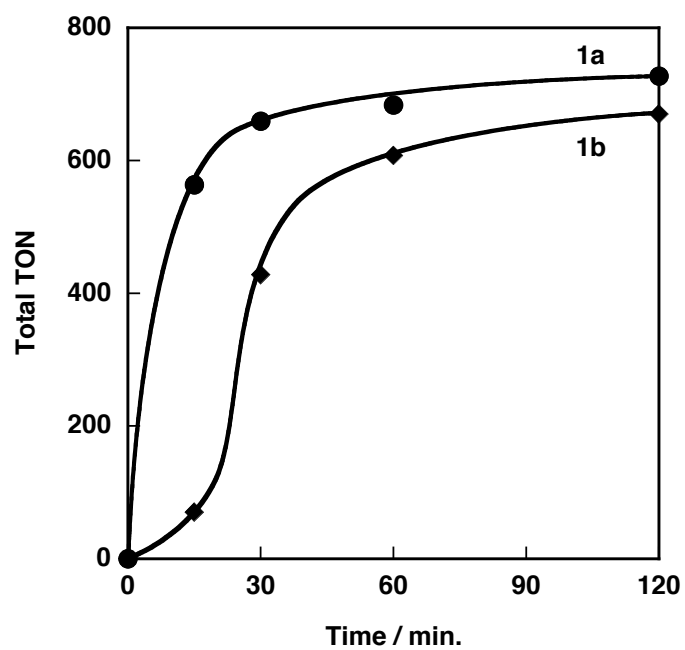

**Fig. S3** Time courses for the oxidation of cyclohexane (2.5 M) with *m*-CPBA (0.33 M) catalyzed by (●)  $[\text{Ni}^{\text{II}}(\text{TPA})(\text{OAc})(\text{H}_2\text{O})]\text{BPh}_4$  (**1a**) (0.33 mM) and by (◆)  $[\text{Ni}^{\text{II}}_2(\text{TPA})_2(\mu\text{-NO}_3)_2](\text{BPh}_4)_2$  (**1b**) (0.17 mM) in  $\text{CH}_2\text{Cl}_2/\text{CH}_3\text{CN}$  (v/v = 3/1, totally 6 ml) at room temperature.

Fig. S4

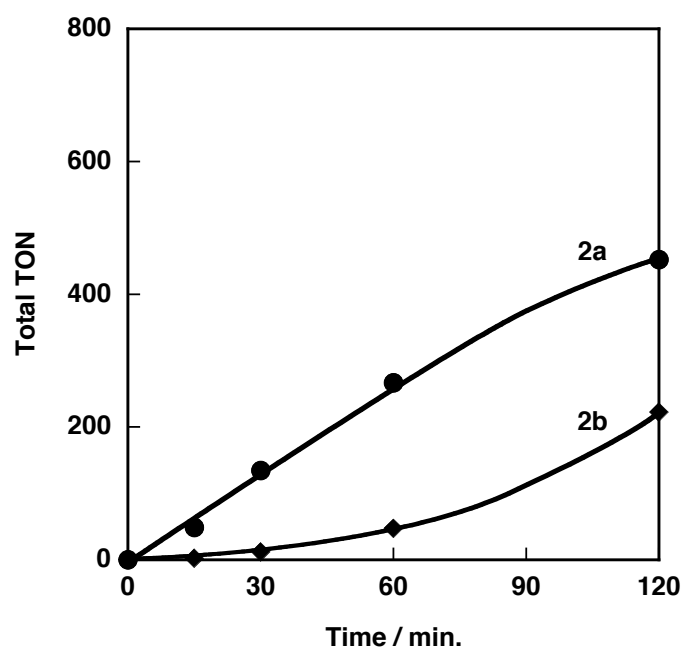

**Fig. S4** Time courses for the oxidation of cyclohexane (2.5 M) with *m*-CPBA (0.33 M) catalyzed by (●)  $[\text{Ni}^{\text{II}}(\text{TEPA})(\text{OAc})]\text{BPh}_4$  (**2a**) (0.33 mM) and by (◆)  $[\text{Ni}^{\text{II}}(\text{TEPA})(\text{NO}_3)]\text{BPh}_4$  (**2b**) (0.33 mM) in  $\text{CH}_2\text{Cl}_2/\text{CH}_3\text{CN}$  (v/v = 3/1, totally 6 ml) at room temperature.



Fig. S5

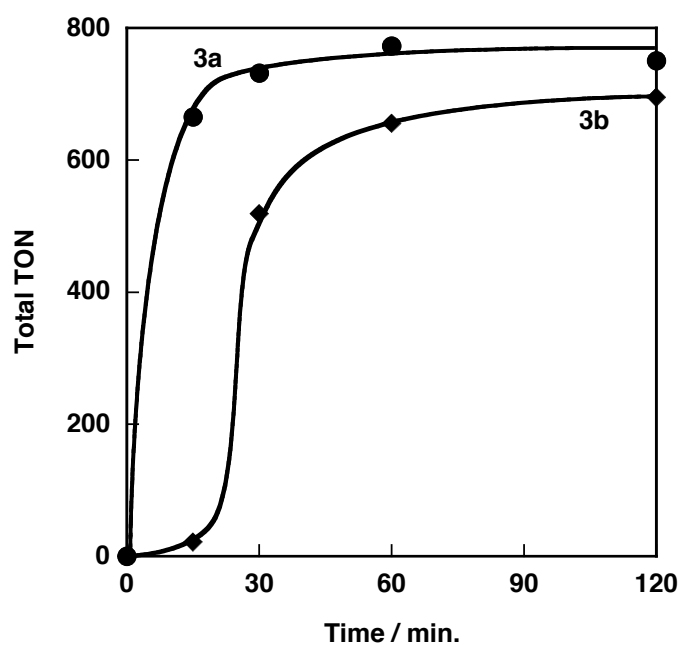

**Fig. S5** Time courses for the oxidation of cyclohexane (2.5 M) with *m*-CPBA (0.33 M) catalyzed by (●)  $[\text{Ni}^{\text{II}}(\text{D}^{\text{tbp}}\text{Pym2H})(\text{OAc})(\text{MeOH})]\text{BPh}_4$  (**3a**) (0.33 mM) and by (◆)  $[\text{Ni}^{\text{II}}(\text{D}^{\text{tbp}}\text{Pym2H})(\text{NO}_3)(\text{MeCN})]\text{NO}_3$  (**3b**) (0.33 mM) in  $\text{CH}_2\text{Cl}_2/\text{CH}_3\text{CN}$  (v/v = 3/1, totally 6 ml) at room temperature.

**Fig. S6**

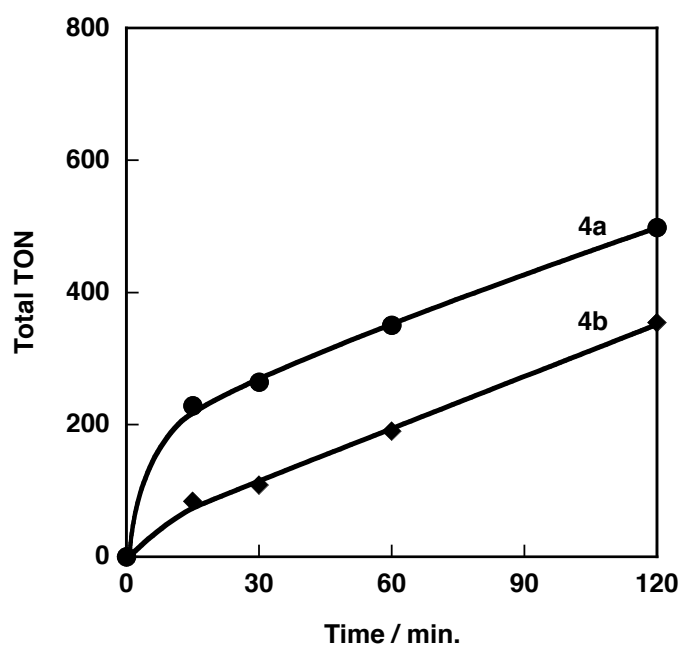

**Fig. S6** Time courses for the oxidation of cyclohexane (2.5 M) with *m*-CPBA (0.33 M) catalyzed by (●)  $[\text{Ni}^{\text{II}}(\text{D}^{\text{tbp}}\text{Pye}2)(\text{OAc})]$  (**4a**) (0.33 mM) and by (◆)  $[\text{Ni}^{\text{II}}(\text{D}^{\text{tbp}}\text{Pye}2)(\text{NO}_3)]$  (**4b**) (0.33 mM) in  $\text{CH}_2\text{Cl}_2/\text{CH}_3\text{CN}$  (v/v = 3/1, totally 6 ml) at room temperature.
